# Supplementary material for: Wolbachia-mediated resistance to Zika virus infection in Aedes aegypti is dominated by diverse transcriptional regulation and weak evolutionary pressures
Source: PubMed Central journal article supplement (PMC10569609; doi:10.1371/journal.pntd.0011674), 2023-10-02

**A.**

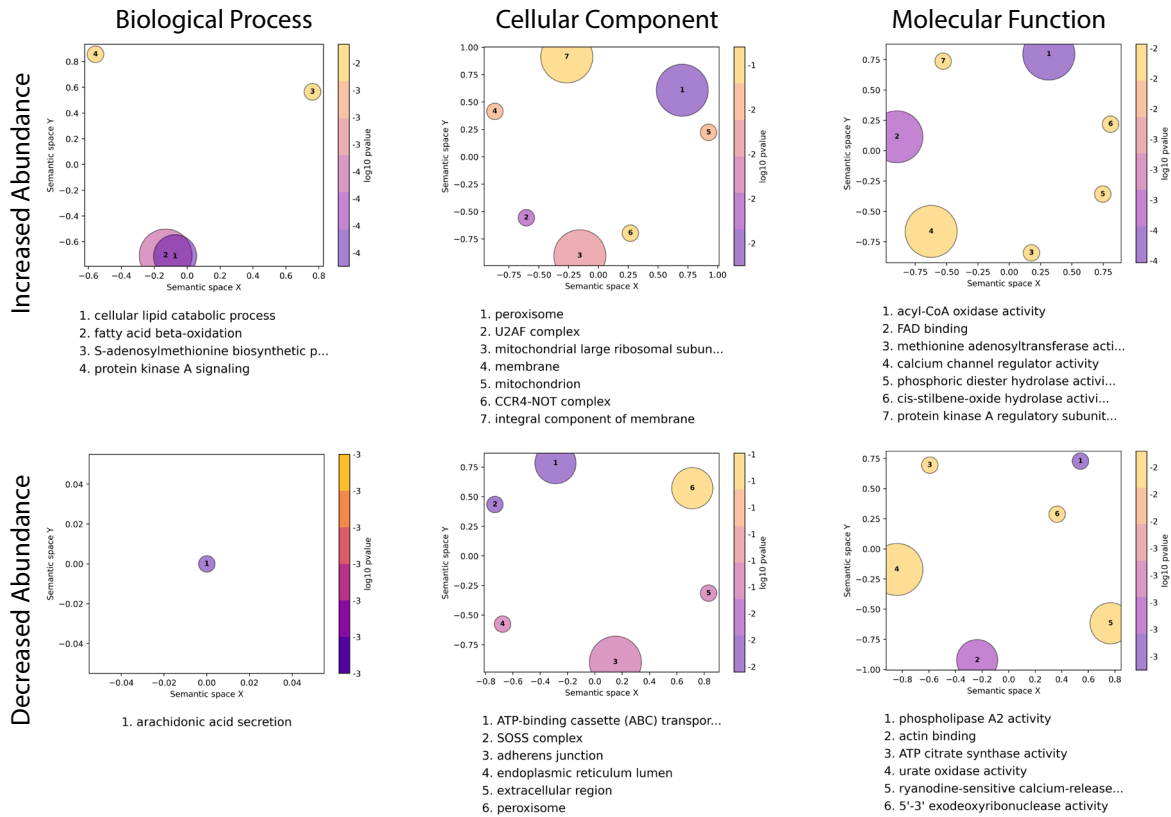

**B.**

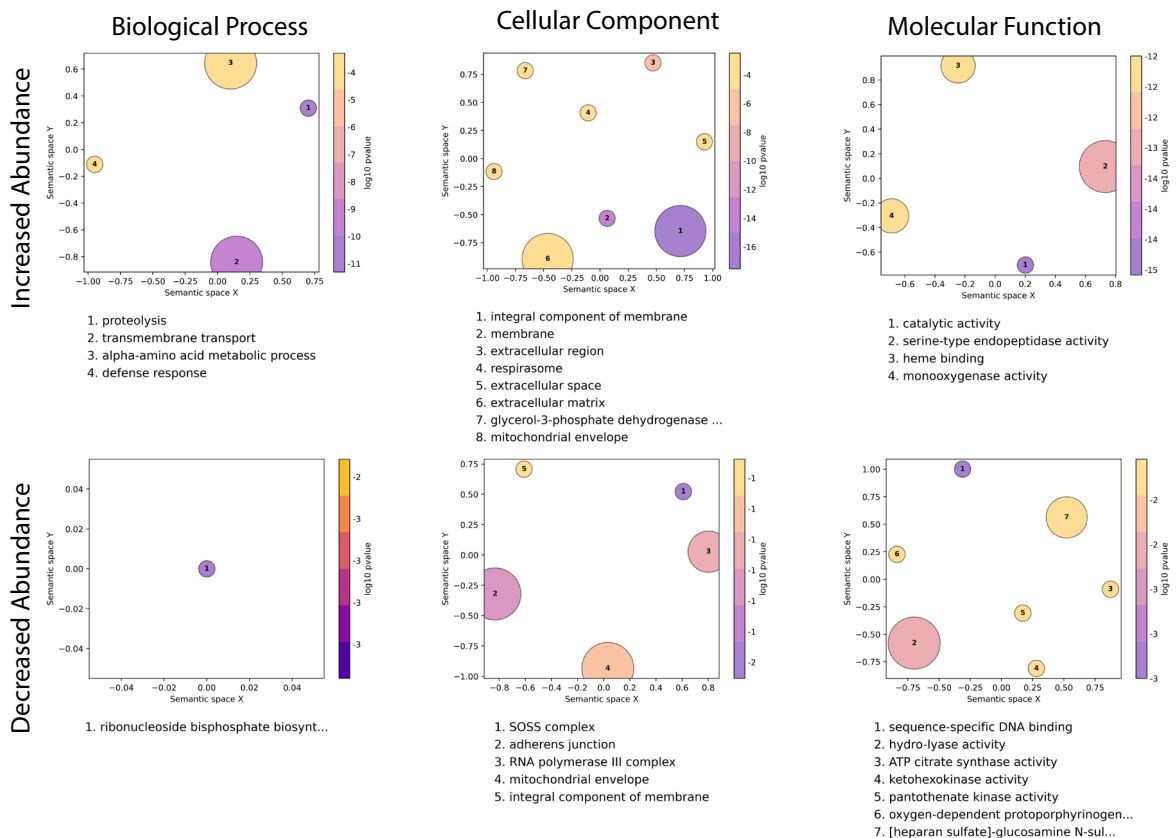

**C.**

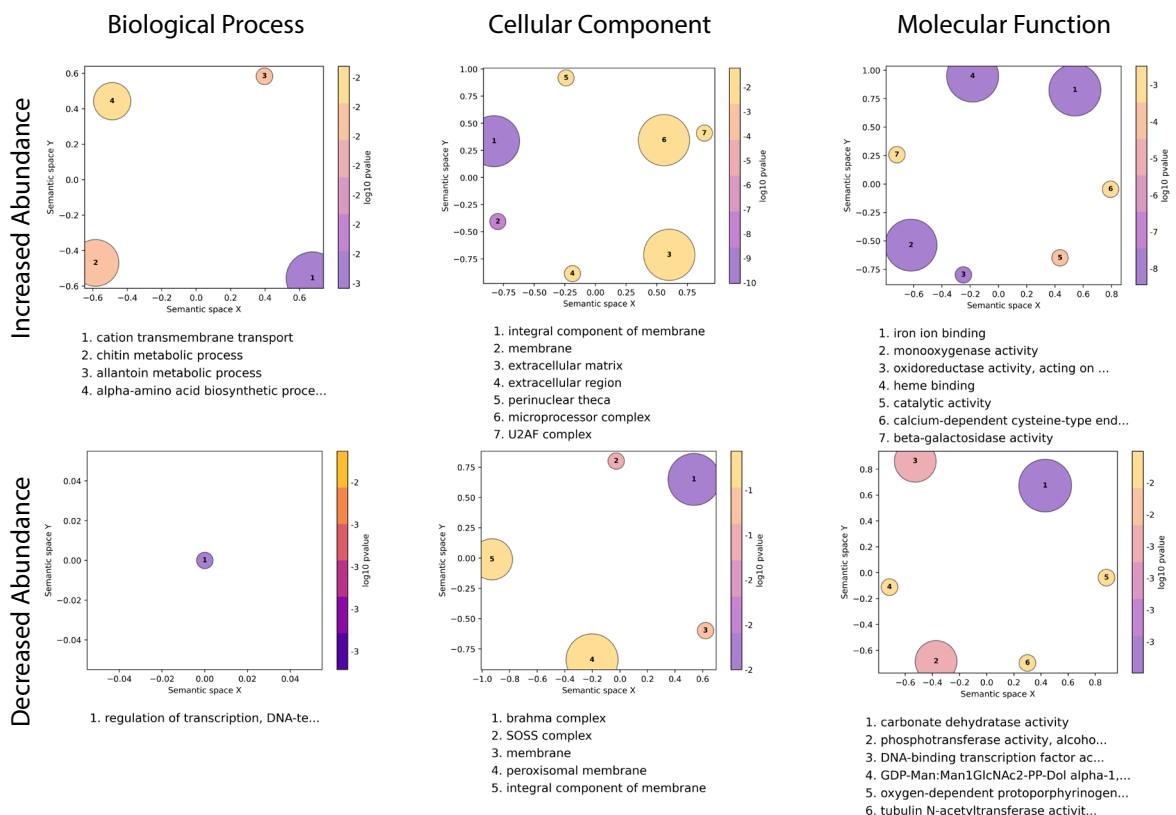

Supplement: pntd.0011674.s003.pdf [file pntd.0011674.s003.pdf]
