# Supplementary material for: Wolbachia-mediated resistance to Zika virus infection in Aedes aegypti is dominated by diverse transcriptional regulation and weak evolutionary pressures
Source: PubMed Central journal article supplement (PMC10569609; doi:10.1371/journal.pntd.0011674), 2023-10-02
Supplement: pntd.0011674.s007.pdf [file pntd.0011674.s007.pdf]

Frequency of iSNV 5155

COL.tet  
body

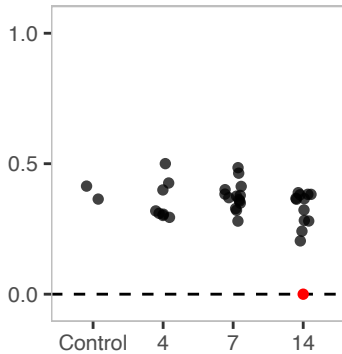

COL.tet  
legs

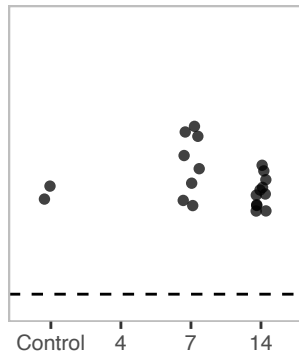

COL.tet  
saliva

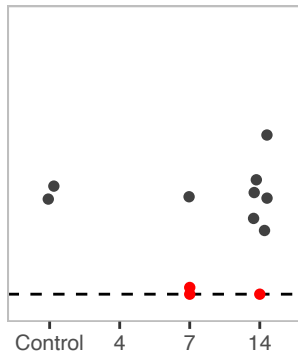

COL.wMel  
body

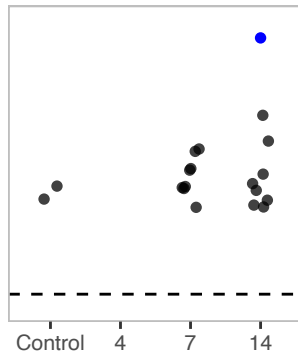

COL.wMel  
legs

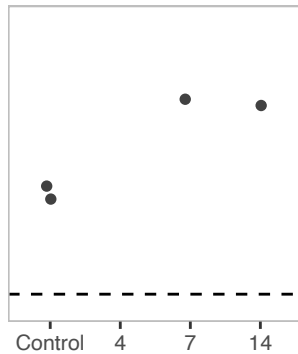

Days post-feeding
