# Supplementary material for: Wolbachia-mediated resistance to Zika virus infection in Aedes aegypti is dominated by diverse transcriptional regulation and weak evolutionary pressures
Source: PubMed Central journal article supplement (PMC10569609; doi:10.1371/journal.pntd.0011674), 2023-10-02
Supplement: pntd.0011674.s008.pdf [file pntd.0011674.s008.pdf]

**S1 Table. Mosquito innate immune genes differentially expressed in COL.wMel relative to COL.tet.**

| Vectorbase ID | Gene Name | Product Description                                                              | GO term: CC                              | GO term: MF                                                                                             | GO term: BP                                   | Sample Group                    |
|---------------|-----------|----------------------------------------------------------------------------------|------------------------------------------|---------------------------------------------------------------------------------------------------------|-----------------------------------------------|---------------------------------|
| AAEL000037    | CLIPB35   | Clip-Domain Serine Protease family B.                                            | extracellular region                     | hydrolase activity;peptidase activity;serine-type endopeptidase activity;serine-type peptidase activity | proteolysis                                   | carcass_4, carcass_7            |
| AAEL000227    | SCRB8     | Class B Scavenger Receptor (CD36 domain).                                        | integral component of membrane;membrane  | N/A                                                                                                     | N/A                                           | carcass_4                       |
| AAEL000234    | SCRB7     | Class B Scavenger Receptor (CD36 domain).                                        | membrane                                 | N/A                                                                                                     | N/A                                           | carcass_4                       |
| AAEL000652    | GNBPA2    | Gram-Negative Binding Protein (GNBP) or Beta-1 3-Glucan Binding Protein (BGBP).  | N/A                                      | carbohydrate binding;hydrolase activity, hydrolyzing O-glycosyl compounds                               | carbohydrate metabolic process                | midgut_7                        |
| AAEL000726    | N/A       | fibrinogen and fibronectin                                                       | N/A                                      | N/A                                                                                                     | N/A                                           | carcass_7                       |
| AAEL000749    | N/A       | Angiotensin-like protein variant (Fragment) [Source:UniProtKB/TrEMBL;Acc:Q1HRV2] | N/A                                      | N/A                                                                                                     | N/A                                           | carcass_7                       |
| AAEL000760    | CLIPB30   | Clip-Domain Serine Protease family B.                                            | extracellular region                     | hydrolase activity;peptidase activity;serine-type endopeptidase activity;serine-type peptidase activity | proteolysis                                   | carcass_7                       |
| AAEL001401    | LRIM10A   | leucine-rich immune protein (Short)                                              | N/A                                      | protein binding                                                                                         | N/A                                           | carcass_4, carcass_7            |
| AAEL001402    | LRIM10B   | leucine-rich immune protein (Short)                                              | N/A                                      | protein binding                                                                                         | N/A                                           | carcass_4, carcass_7            |
| AAEL001414    | LRIM9     | leucine-rich immune protein (Short)                                              | N/A                                      | protein binding                                                                                         | N/A                                           | carcass_4, carcass_4, carcass_7 |
| AAEL001417    | LRIM7     | leucine-rich immune protein (Short)                                              | N/A                                      | protein binding                                                                                         | N/A                                           | carcass_4, carcass_7            |
| AAEL001420    | LRIM8     | leucine-rich immune protein (Short)                                              | N/A                                      | protein binding                                                                                         | N/A                                           | carcass_4, carcass_7            |
| AAEL001650    | N/A       | ML domain-containing protein [Source:UniProtKB/TrEMBL;Acc:A0A1S4ZF1]             | N/A                                      | N/A                                                                                                     | N/A                                           | midgut_7                        |
| AAEL001794    | N/A       | macroglobulin/complement                                                         | extracellular region;extracellular space | endopeptidase inhibitor activity                                                                        | negative regulation of endopeptidase activity | carcass_4, carcass_7            |
| AAEL002309    | TPX4      | Thioredoxin Peroxidase.                                                          | obsolete cell                            | antioxidant activity;oxidoreductas                                                                      | cell redox homeostasis;cellular               | midgut_7                        |

|            |          |                                                                           |                                          |                                                                                                             |                                                                                                             |                      |
|------------|----------|---------------------------------------------------------------------------|------------------------------------------|-------------------------------------------------------------------------------------------------------------|-------------------------------------------------------------------------------------------------------------|----------------------|
|            |          |                                                                           |                                          | e activity;peroxiredoxin activity                                                                           | oxidant detoxification;obsolete oxidation-reduction process                                                 |                      |
| AAEL002601 | CLIPA1   | Clip-Domain Serine Protease family A. Protease homologue.                 | N/A                                      | serine-type endopeptidase activity                                                                          | proteolysis                                                                                                 | carcass_4            |
| AAEL002720 | SRPN20   | Serine Protease Inhibitor (serpin) likely cleavage at V/V.                | extracellular space                      | N/A                                                                                                         | N/A                                                                                                         | carcass_4            |
| AAEL002731 | SRPN14   | Serine Protease Inhibitor (serpin) homologue - unlikely to be inhibitory. | extracellular space                      | N/A                                                                                                         | N/A                                                                                                         | carcass_4, carcass_7 |
| AAEL003156 | N/A      | fibrinogen and fibronectin                                                | N/A                                      | N/A                                                                                                         | N/A                                                                                                         | carcass_4            |
| AAEL003182 | SRPN26   | Serine Protease Inhibitor (serpin) homologue - unlikely to be inhibitory. | extracellular space                      | N/A                                                                                                         | N/A                                                                                                         | midgut_4             |
| AAEL003253 | CLIPB13B | Clip-Domain Serine Protease family B.                                     | N/A                                      | serine-type endopeptidase activity                                                                          | proteolysis                                                                                                 | carcass_4, carcass_7 |
| AAEL003294 | N/A      | fibrinogen and fibronectin                                                | N/A                                      | N/A                                                                                                         | N/A                                                                                                         | midgut_7             |
| AAEL003389 | ATT      | attacin anti-microbial peptide                                            | extracellular region;extracellular space | N/A                                                                                                         | antibacterial humoral response;defense response to bacterium                                                | carcass_4            |
| AAEL003439 | CASPS18  | caspase (short)                                                           | N/A                                      | cysteine-type endopeptidase activity;cysteine-type peptidase activity                                       | proteolysis                                                                                                 | midgut_7             |
| AAEL003444 | CASPS19  | caspase (short)                                                           | N/A                                      | cysteine-type endopeptidase activity;cysteine-type peptidase activity;hydrolase activity;peptidase activity | proteolysis                                                                                                 | midgut_7             |
| AAEL003631 | CLIPB41  | Clip-Domain Serine Protease family B.                                     | N/A                                      | hydrolase activity;peptidase activity;serine-type endopeptidase activity;serine-type peptidase activity     | proteolysis                                                                                                 | carcass_4            |
| AAEL003697 | SRPN17   | Serine Protease Inhibitor (serpin) homologue - unlikely to be inhibitory. | extracellular space                      | N/A                                                                                                         | N/A                                                                                                         | carcass_4, carcass_7 |
| AAEL003712 | LYSC10   | C-Type Lysozyme (Lys-E).                                                  | N/A                                      | lysozyme activity                                                                                           | N/A                                                                                                         | midgut_7             |
| AAEL003723 | LYSC11   | C-Type Lysozyme (Lys-A).                                                  | N/A                                      | lysozyme activity                                                                                           | N/A                                                                                                         | midgut_4             |
| AAEL004390 | HPX8B    | heme peroxidase                                                           | N/A                                      | heme binding;peroxidase activity                                                                            | cellular oxidant detoxification;obsolete oxidation-reduction process;oogenesis;response to oxidative stress | midgut_4             |

|            |         |                                                                           |                                         |                                                                                                         |                                                                                                  |                      |
|------------|---------|---------------------------------------------------------------------------|-----------------------------------------|---------------------------------------------------------------------------------------------------------|--------------------------------------------------------------------------------------------------|----------------------|
| AAEL004833 | N/A     | unspecified product                                                       | extracellular region                    | N/A                                                                                                     | defense response to bacterium                                                                    | carcass_4, carcass_4 |
| AAEL004978 | N/A     | DEAD box ATP-dependent RNA helicase                                       | N/A                                     | ATP binding;helicase activity;hydrolase activity;nucleic acid binding;nucleotide binding                | N/A                                                                                              | midgut_4             |
| AAEL004979 | CLIPD2  | Clip-Domain Serine Protease family D.                                     | N/A                                     | hydrolase activity;peptidase activity;serine-type endopeptidase activity;serine-type peptidase activity | proteolysis                                                                                      | carcass_4            |
| AAEL005108 | MNSOD2  | manganese-iron (Mn-Fe) superoxide dismutase                               | N/A                                     | metal ion binding;oxidoreductase activity;superoxide dismutase activity                                 | obsolete oxidation-reduction process;removal of superoxide radicals;superoxide metabolic process | carcass_4, carcass_7 |
| AAEL005293 | GALE8A  | Galectin [Source:UniProtKB/TrEMBL;Acc:Q16ND5]                             | N/A                                     | carbohydrate binding                                                                                    | N/A                                                                                              | midgut_7             |
| AAEL005482 | CTL18   | C-Type Lectin (CTL).                                                      | N/A                                     | carbohydrate binding                                                                                    | N/A                                                                                              | midgut_4             |
| AAEL005641 | CTLGA5  | C-Type Lectin (CTL) - galactose binding.                                  | N/A                                     | N/A                                                                                                     | N/A                                                                                              | midgut_7             |
| AAEL005956 | CASPS16 | caspase (short)                                                           | N/A                                     | cysteine-type endopeptidase activity;cysteine-type peptidase activity                                   | proteolysis                                                                                      | midgut_4, carcass_4  |
| AAEL006161 | CLIPB31 | Clip-Domain Serine Protease family B                                      | extracellular region                    | hydrolase activity;peptidase activity;serine-type endopeptidase activity;serine-type peptidase activity | proteolysis                                                                                      | carcass_4            |
| AAEL006355 | SCRC1   | Class C Scavenger Receptor (Sushi/SCR/CCP MAM and Somatomedin B domains). | integral component of membrane;membrane | N/A                                                                                                     | N/A                                                                                              | midgut_7             |
| AAEL006361 | SCRC2   | Class C Scavenger Receptor (Sushi/SCR/CCP MAM and Somatomedin B domains). | integral component of membrane;membrane | N/A                                                                                                     | N/A                                                                                              | midgut_4, midgut_7   |
| AAEL006377 | LRIM31  | leucine-rich immune protein (Coil-less)                                   | N/A                                     | protein binding                                                                                         | N/A                                                                                              | carcass_4            |
| AAEL006674 | CLIPB29 | Clip-Domain Serine Protease family B.                                     | extracellular region                    | hydrolase activity;peptidase activity;serine-type endopeptidase activity;serine-type peptidase activity | proteolysis                                                                                      | carcass_4            |
| AAEL006704 | N/A     | fibrinogen and fibronectin                                                | N/A                                     | N/A                                                                                                     | N/A                                                                                              | midgut_7             |
| AAEL006854 | N/A     | Niemann-Pick Type C-2, putative                                           | N/A                                     | N/A                                                                                                     | intracellular cholesterol transport                                                              | midgut_4, midgut_7   |
| AAEL007103 | LRIM15  | leucine-rich immune protein (TM)                                          | integral component of                   | protein binding                                                                                         | N/A                                                                                              | carcass_4            |

|            |         |                                                                                 |                                         |                                                                                                         |                                                                              |                      |
|------------|---------|---------------------------------------------------------------------------------|-----------------------------------------|---------------------------------------------------------------------------------------------------------|------------------------------------------------------------------------------|----------------------|
|            |         |                                                                                 | membrane;membrane                       |                                                                                                         |                                                                              |                      |
| AAEL007224 | LRIM22  | leucine-rich immune protein (Coil-less)                                         | N/A                                     | protein binding                                                                                         | N/A                                                                          | carcass_4, carcass_7 |
| AAEL007624 | REL2    | IMD pathway signalling NF-kappaB Relish-like transcription factor               | cytoplasm;host cell nucleus;nucleus     | DNA binding;DNA-binding transcription factor activity;protein binding                                   | regulation of transcription, DNA-templated                                   | midgut_7             |
| AAEL007696 | REL1A   | TOLL pathway signalling NF-kappaB Relish-like transcription factor              | cytoplasm;host cell nucleus;nucleus     | DNA binding;DNA-binding transcription factor activity                                                   | regulation of transcription, DNA-templated                                   | carcass_4, carcass_7 |
| AAEL007823 | N/A     | PIWI                                                                            | N/A                                     | nucleic acid binding;protein binding                                                                    | gene silencing by RNA                                                        | midgut_7             |
| AAEL007993 | CLIPB27 | Clip-Domain Serine Protease family B.                                           | extracellular region                    | hydrolase activity;peptidase activity;serine-type endopeptidase activity;serine-type peptidase activity | proteolysis                                                                  | midgut_4, midgut_7   |
| AAEL008098 | PIWI2   | PIWI                                                                            | N/A                                     | nucleic acid binding;protein binding                                                                    | gene silencing by RNA                                                        | midgut_4             |
| AAEL008370 | SCRB17  | Class B Scavenger Receptor (CD36 domain).                                       | integral component of membrane;membrane | N/A                                                                                                     | N/A                                                                          | carcass_4, carcass_7 |
| AAEL008658 | LRIM16  | leucine-rich immune protein (TM)                                                | integral component of membrane;membrane | protein binding                                                                                         | N/A                                                                          | midgut_4, midgut_7   |
| AAEL008668 | CLIPB22 | Clip-Domain Serine Protease family B.                                           | N/A                                     | serine-type endopeptidase activity                                                                      | proteolysis                                                                  | carcass_4            |
| AAEL009178 | GNNBP4  | Gram-Negative Binding Protein (GNBP) or Beta-1 3-Glucan Binding Protein (BGBP). | N/A                                     | hydrolase activity, hydrolyzing O-glycosyl compounds                                                    | carbohydrate metabolic process                                               | carcass_7            |
| AAEL009384 | N/A     | fibrinogen and fibronectin                                                      | N/A                                     | N/A                                                                                                     | N/A                                                                          | midgut_7             |
| AAEL009474 | PGRPS1  | Peptidoglycan Recognition Protein (Short)                                       | N/A                                     | N-acetylmuramoyl-L-alanine amidase activity;peptidoglycan binding;zinc ion binding                      | immune system process;innate immune response;peptidoglycan catabolic process | carcass_4            |
| AAEL009556 | N/A     | Niemann-Pick Type C-2, putative                                                 | N/A                                     | N/A                                                                                                     | intracellular cholesterol transport                                          | midgut_4, midgut_7   |
| AAEL009792 | LRIM25  | leucine-rich immune protein (Coil-less)                                         | N/A                                     | protein binding                                                                                         | N/A                                                                          | carcass_7            |
| AAEL009842 | GALE12  | Galectin [Source:UniProtKB/TrEMBL;Acc:Q16UP1]                                   | N/A                                     | N/A                                                                                                     | N/A                                                                          | midgut_4, midgut_7   |
| AAEL009850 | GALE14  | Galectin [Source:UniProtKB/TrEMBL;Acc:Q16UP0]                                   | N/A                                     | carbohydrate binding                                                                                    | N/A                                                                          | midgut_4, midgut_7   |

|            |         |                                                             |                                         |                                                              |                                      |                      |
|------------|---------|-------------------------------------------------------------|-----------------------------------------|--------------------------------------------------------------|--------------------------------------|----------------------|
| AAEL009894 | LRIM21  | leucine-rich immune protein (Coil-less)                     | integral component of membrane;membrane | protein binding                                              | N/A                                  | midgut_4, midgut_7   |
| AAEL010125 | LRIM17  | leucine-rich immune protein (Coil-less)                     | N/A                                     | protein binding                                              | N/A                                  | carcass_4            |
| AAEL010128 | LRIM4   | leucine-rich immune protein (Long)                          | N/A                                     | protein binding                                              | N/A                                  | carcass_4, carcass_7 |
| AAEL010132 | LRIM3   | leucine-rich immune protein (Long)                          | N/A                                     | protein binding                                              | N/A                                  | carcass_4            |
| AAEL010769 | SRPN6   | Serine Protease Inhibitor (serpin) likely cleavage at S/A.  | extracellular space                     | N/A                                                          | N/A                                  | carcass_7            |
| AAEL011009 | N/A     | fibrinogen and fibronectin                                  | N/A                                     | N/A                                                          | N/A                                  | carcass_4, carcass_7 |
| AAEL011407 | CTL20   | C-Type Lectin (CTL20)                                       | N/A                                     | N/A                                                          | N/A                                  | midgut_4             |
| AAEL011408 | CTL21   | C-Type Lectin (CTL21)                                       | N/A                                     | N/A                                                          | N/A                                  | carcass_4, carcass_7 |
| AAEL011453 | CTL14   | C-Type Lectin (CTL14)                                       | N/A                                     | N/A                                                          | N/A                                  | carcass_4, carcass_7 |
| AAEL011455 | CTLMA12 | C-Type Lectin (CTLMA12) - mannose binding                   | N/A                                     | carbohydrate binding                                         | N/A                                  | carcass_4            |
| AAEL011621 | CTLMA13 | C-Type Lectin (CTL) - mannose binding.                      | N/A                                     | carbohydrate binding;serine-type endopeptidase activity      | proteolysis                          | carcass_4, carcass_7 |
| AAEL011633 | N/A     | fibrinogen and fibronectin                                  | N/A                                     | N/A                                                          | N/A                                  | carcass_4            |
| AAEL011763 | PPO3    | prophenoloxidase                                            | N/A                                     | metal ion binding;oxidoreductase activity                    | obsolete oxidation-reduction process | carcass_4            |
| AAEL011764 | PPO10   | prophenoloxidase                                            | N/A                                     | metal ion binding;oxidoreductase activity                    | obsolete oxidation-reduction process | carcass_4, carcass_7 |
| AAEL012003 | GALE6B  | Galectin [Source:UniProtKB/TrEMBL;Acc:Q17AG2]               | N/A                                     | carbohydrate binding                                         | N/A                                  | midgut_7             |
| AAEL012086 | LRIM1   | leucine-rich immune protein (Long)                          | N/A                                     | protein binding                                              | N/A                                  | carcass_4, carcass_7 |
| AAEL012255 | LRIM13  | leucine-rich immune protein (Short)                         | N/A                                     | protein binding                                              | N/A                                  | carcass_4, carcass_7 |
| AAEL012380 | PGRPLA  | Peptidoglycan Recognition Protein (Long)                    | integral component of membrane;membrane | N-acetylmuramoyl-L-alanine amidase activity;zinc ion binding | peptidoglycan catabolic process      | midgut_4, midgut_7   |
| AAEL012471 | DOME    | JAKSTAT pathway signalling Transmembrane Receptor Domeless. | integral component of membrane;membrane | cytokine receptor activity;protein binding                   | cytokine-mediated signaling pathway  | midgut_7             |
| AAEL012763 | LRIM24  | leucine-rich immune protein (Coil-less)                     | N/A                                     | protein binding                                              | N/A                                  | carcass_4            |

|            |         |                                                                      |                                         |                                                                                                             |                                      |                                                                  |
|------------|---------|----------------------------------------------------------------------|-----------------------------------------|-------------------------------------------------------------------------------------------------------------|--------------------------------------|------------------------------------------------------------------|
| AAEL012767 | LRIM5   | leucine-rich immune protein (Short)                                  | N/A                                     | protein binding                                                                                             | N/A                                  | carcass_4                                                        |
| AAEL012911 | LRIM18  | leucine-rich immune protein (Coil-less)                              | integral component of membrane;membrane | protein binding                                                                                             | N/A                                  | carcass_4                                                        |
| AAEL013245 | CLIPB28 | Clip-Domain Serine Protease family B.                                | N/A                                     | peptidase activity;serine-type endopeptidase activity                                                       | proteolysis                          | carcass_7, carcass_7                                             |
| AAEL013417 | N/A     | fibrinogen and fibronectin                                           | N/A                                     | N/A                                                                                                         | N/A                                  | carcass_4                                                        |
| AAEL013496 | PPO8    | prophenoloxidase                                                     | N/A                                     | metal ion binding;oxidoreductase activity                                                                   | obsolete oxidation-reduction process | carcass_4                                                        |
| AAEL013692 | PIWI3   | PIWI                                                                 | N/A                                     | nucleic acid binding;protein binding                                                                        | gene silencing by RNA                | midgut_4                                                         |
| AAEL014348 | CASPS8  | caspase (short)                                                      | N/A                                     | cysteine-type endopeptidase activity;cysteine-type peptidase activity;hydrolase activity;peptidase activity | proteolysis                          | midgut_7, midgut_7                                               |
| AAEL014382 | CTLMA14 | C-Type Lectin (CTL) - mannose binding.                               | N/A                                     | carbohydrate binding                                                                                        | N/A                                  | carcass_4                                                        |
| AAEL014544 | PPO6    | prophenoloxidase                                                     | N/A                                     | metal ion binding;oxidoreductase activity                                                                   | obsolete oxidation-reduction process | carcass_4, carcass_7                                             |
| AAEL017536 | GRRP    | holotricin glycine rich repeat protein (GRRP) anti-microbial peptide | N/A                                     | N/A                                                                                                         | N/A                                  | carcass_4, carcass_4, carcass_4, carcass_7, carcass_7, carcass_7 |

CC, cellular component; MF, molecular function; BP, biological process.
