# Supplementary material for: Wolbachia-mediated resistance to Zika virus infection in Aedes aegypti is dominated by diverse transcriptional regulation and weak evolutionary pressures
Source: PubMed Central journal article supplement (PMC10569609; doi:10.1371/journal.pntd.0011674), 2023-10-02
Supplement: pntd.0011674.s009.pdf [file pntd.0011674.s009.pdf]

**S2 Table. Mosquito innate immune genes differentially expressed in COL.wMel relative to COL.tet during ZIKV infection.**

| Vectorbase ID | Gene Name | Product Description                                                             | GO term: CC                              | GO term: MF                                                                                             | GO term: BP                                                      | Sample Group                               |
|---------------|-----------|---------------------------------------------------------------------------------|------------------------------------------|---------------------------------------------------------------------------------------------------------|------------------------------------------------------------------|--------------------------------------------|
| AAEL000037    | CLIPB35   | Clip-Domain Serine Protease family B.                                           | extracellular region                     | hydrolase activity;peptidase activity;serine-type endopeptidase activity;serine-type peptidase activity | proteolysis                                                      | carcass_4                                  |
| AAEL000057    | TOLL5B    | Toll-like receptor                                                              | integral component of membrane;membrane  | protein binding                                                                                         | immune system process;innate immune response;signal transduction | carcass_4                                  |
| AAEL000227    | SCRB8     | Class B Scavenger Receptor (CD36 domain).                                       | integral component of membrane;membrane  | N/A                                                                                                     | N/A                                                              | carcass_4                                  |
| AAEL000234    | SCRB7     | Class B Scavenger Receptor (CD36 domain).                                       | membrane                                 | N/A                                                                                                     | N/A                                                              | carcass_7                                  |
| AAEL000652    | GNBPA2    | Gram-Negative Binding Protein (GNBP) or Beta-1 3-Glucan Binding Protein (BGBP). | N/A                                      | carbohydrate binding;hydrolase activity, hydrolyzing O-glycosyl compounds                               | carbohydrate metabolic process                                   | midgut_4                                   |
| AAEL000760    | CLIPB30   | Clip-Domain Serine Protease family B.                                           | extracellular region                     | hydrolase activity;peptidase activity;serine-type endopeptidase activity;serine-type peptidase activity | proteolysis                                                      | carcass_4                                  |
| AAEL001077    | CLIPB45   | Clip-Domain Serine Protease family B. Protease homologue.                       | N/A                                      | serine-type endopeptidase activity                                                                      | proteolysis                                                      | carcass_4, carcass_7                       |
| AAEL001401    | LRIM10A   | leucine-rich immune protein (Short)                                             | N/A                                      | protein binding                                                                                         | N/A                                                              | carcass_4                                  |
| AAEL001402    | LRIM10B   | leucine-rich immune protein (Short)                                             | N/A                                      | protein binding                                                                                         | N/A                                                              | carcass_4                                  |
| AAEL001414    | LRIM9     | leucine-rich immune protein (Short)                                             | N/A                                      | protein binding                                                                                         | N/A                                                              | carcass_4, carcass_4, carcass_7, carcass_7 |
| AAEL001417    | LRIM7     | leucine-rich immune protein (Short)                                             | N/A                                      | protein binding                                                                                         | N/A                                                              | carcass_4                                  |
| AAEL001420    | LRIM8     | leucine-rich immune protein (Short)                                             | N/A                                      | protein binding                                                                                         | N/A                                                              | carcass_4, carcass_7                       |
| AAEL001794    | N/A       | macroglobulin/complement                                                        | extracellular region;extracellular space | endopeptidase inhibitor activity                                                                        | negative regulation of endopeptidase activity                    | carcass_4                                  |
| AAEL002126    | CLIPA15   | Clip-Domain Serine Protease family A. Protease homologue.                       | N/A                                      | serine-type endopeptidase activity                                                                      | proteolysis                                                      | carcass_4                                  |
| AAEL002601    | CLIPA1    | Clip-Domain Serine Protease family A.                                           | N/A                                      | serine-type endopeptidase                                                                               | proteolysis                                                      | carcass_4                                  |

|            |          |                                                                                     |                      |                                                                                                         |                                                                                             |                      |
|------------|----------|-------------------------------------------------------------------------------------|----------------------|---------------------------------------------------------------------------------------------------------|---------------------------------------------------------------------------------------------|----------------------|
|            |          | Protease homologue.                                                                 |                      | activity                                                                                                |                                                                                             |                      |
| AAEL002720 | SRPN20   | Serine Protease Inhibitor (serpin) likely cleavage at V/V.                          | extracellular space  | N/A                                                                                                     | N/A                                                                                         | carcass_4            |
| AAEL002731 | SRPN14   | Serine Protease Inhibitor (serpin) homologue - unlikely to be inhibitory.           | extracellular space  | N/A                                                                                                     | N/A                                                                                         | carcass_4            |
| AAEL003253 | CLIPB13B | Clip-Domain Serine Protease family B.                                               | N/A                  | serine-type endopeptidase activity                                                                      | proteolysis                                                                                 | carcass_4            |
| AAEL003631 | CLIPB41  | Clip-Domain Serine Protease family B.                                               | N/A                  | hydrolase activity;peptidase activity;serine-type endopeptidase activity;serine-type peptidase activity | proteolysis                                                                                 | carcass_4, carcass_7 |
| AAEL003697 | SRPN17   | Serine Protease Inhibitor (serpin) homologue - unlikely to be inhibitory.           | extracellular space  | N/A                                                                                                     | N/A                                                                                         | carcass_4            |
| AAEL003832 | DEFC     | defensin anti-microbial peptide                                                     | extracellular region | N/A                                                                                                     | defense response;defense response to bacterium;immune system process;innate immune response | carcass_4            |
| AAEL003841 | DEFA     | Defensin-A [Source:UniProtKB/Swiss-Prot;Acc:P91793]                                 | N/A                  | N/A                                                                                                     | defense response                                                                            | carcass_4            |
| AAEL003857 | N/A      | INVERT_DEFENSINS domain-containing protein [Source:UniProtKB/TrEMBL;Acc:A0A1S4F676] | N/A                  | N/A                                                                                                     | defense response                                                                            | carcass_4            |
| AAEL004120 | N/A      | Niemann-Pick Type C-2, putative                                                     | N/A                  | N/A                                                                                                     | intracellular cholesterol transport                                                         | carcass_4            |
| AAEL004524 | CLIPC5B  | Clip-Domain Serine Protease family C.                                               | N/A                  | hydrolase activity;peptidase activity;serine-type endopeptidase activity;serine-type peptidase activity | proteolysis                                                                                 | carcass_4            |
| AAEL004833 | N/A      | unspecified product                                                                 | extracellular region | N/A                                                                                                     | defense response to bacterium                                                               | carcass_4            |
| AAEL004979 | CLIPD2   | Clip-Domain Serine Protease family D.                                               | N/A                  | hydrolase activity;peptidase activity;serine-type endopeptidase activity;serine-type peptidase activity | proteolysis                                                                                 | carcass_7            |
| AAEL005093 | CLIPB46  | Clip-Domain Serine Protease family B.                                               | extracellular region | hydrolase activity;peptidase activity;serine-type endopeptidase activity;serine-type peptidase activity | proteolysis                                                                                 | carcass_4            |
| AAEL005108 | MNSOD2   | manganese-iron (Mn-Fe) superoxide dismutase                                         | N/A                  | metal ion binding;oxidoreductase activity;superoxide                                                    | obsolete oxidation-reduction process;removal of                                             | carcass_4, carcass_7 |

|            |         |                                                                                 |                                         |                                                                                                         |                                                                              |                      |
|------------|---------|---------------------------------------------------------------------------------|-----------------------------------------|---------------------------------------------------------------------------------------------------------|------------------------------------------------------------------------------|----------------------|
|            |         |                                                                                 |                                         | dismutase activity                                                                                      | superoxide radicals;superoxide metabolic process                             |                      |
| AAEL005431 | CLIPB37 | Clip-Domain Serine Protease family B.                                           | N/A                                     | hydrolase activity;peptidase activity;serine-type endopeptidase activity;serine-type peptidase activity | proteolysis                                                                  | carcass_4            |
| AAEL005792 | CLIPB8  | Clip-Domain Serine Protease family E. Protease homologue.                       | N/A                                     | peptidase activity;serine-type endopeptidase activity                                                   | proteolysis                                                                  | carcass_4            |
| AAEL006161 | CLIPB31 | Clip-Domain Serine Protease family B                                            | extracellular region                    | hydrolase activity;peptidase activity;serine-type endopeptidase activity;serine-type peptidase activity | proteolysis                                                                  | carcass_7            |
| AAEL006377 | LRIM31  | leucine-rich immune protein (Coil-less)                                         | N/A                                     | protein binding                                                                                         | N/A                                                                          | carcass_4, carcass_7 |
| AAEL006674 | CLIPB29 | Clip-Domain Serine Protease family B.                                           | extracellular region                    | hydrolase activity;peptidase activity;serine-type endopeptidase activity;serine-type peptidase activity | proteolysis                                                                  | carcass_4            |
| AAEL007224 | LRIM22  | leucine-rich immune protein (Coil-less)                                         | N/A                                     | protein binding                                                                                         | N/A                                                                          | carcass_4, carcass_7 |
| AAEL007696 | REL1A   | TOLL pathway signalling NF-kappaB Relish-like transcription factor              | cytoplasm;host cell nucleus;nucleus     | DNA binding;DNA-binding transcription factor activity                                                   | regulation of transcription, DNA-templated                                   | carcass_4            |
| AAEL008370 | SCRB17  | Class B Scavenger Receptor (CD36 domain).                                       | integral component of membrane;membrane | N/A                                                                                                     | N/A                                                                          | carcass_4            |
| AAEL009178 | GNBPB4  | Gram-Negative Binding Protein (GNBP) or Beta-1 3-Glucan Binding Protein (BGBP). | N/A                                     | hydrolase activity, hydrolyzing O-glycosyl compounds                                                    | carbohydrate metabolic process                                               | carcass_7            |
| AAEL009420 | SCRBQ1  | Class B Scavenger Receptor (CD36 domain).                                       | integral component of membrane;membrane | N/A                                                                                                     | N/A                                                                          | carcass_7            |
| AAEL009474 | PGRPS1  | Peptidoglycan Recognition Protein (Short)                                       | N/A                                     | N-acetylmuramoyl-L-alanine amidase activity;peptidoglycan binding;zinc ion binding                      | immune system process;innate immune response;peptidoglycan catabolic process | carcass_4            |
| AAEL009842 | GALE12  | Galectin [Source:UniProtKB/TrEMBL;Acc:Q16UP1]                                   | N/A                                     | N/A                                                                                                     | N/A                                                                          | carcass_4            |
| AAEL010128 | LRIM4   | leucine-rich immune protein (Long)                                              | N/A                                     | protein binding                                                                                         | N/A                                                                          | carcass_4            |
| AAEL011009 | N/A     | fibrinogen and fibronectin                                                      | N/A                                     | N/A                                                                                                     | N/A                                                                          | carcass_4            |
| AAEL011407 | CTL20   | C-Type Lectin (CTL20)                                                           | N/A                                     | N/A                                                                                                     | N/A                                                                          | carcass_7            |

|            |         |                                               |                      |                                                                                                         |                                      |                                |
|------------|---------|-----------------------------------------------|----------------------|---------------------------------------------------------------------------------------------------------|--------------------------------------|--------------------------------|
| AAEL011408 | CTL21   | C-Type Lectin (CTL21)                         | N/A                  | N/A                                                                                                     | N/A                                  | carcass_4, carcass_7           |
| AAEL011453 | CTL14   | C-Type Lectin (CTL14)                         | N/A                  | N/A                                                                                                     | N/A                                  | carcass_4, carcass_7           |
| AAEL011455 | CTLMA12 | C-Type Lectin (CTLMA12) - mannose binding     | N/A                  | carbohydrate binding                                                                                    | N/A                                  | carcass_4                      |
| AAEL011621 | CTLMA13 | C-Type Lectin (CTL) - mannose binding.        | N/A                  | carbohydrate binding;serine-type endopeptidase activity                                                 | proteolysis                          | carcass_4, carcass_7           |
| AAEL011633 | N/A     | fibrinogen and fibronectin                    | N/A                  | N/A                                                                                                     | N/A                                  | carcass_4, carcass_7           |
| AAEL011634 | N/A     | fibrinogen and fibronectin                    | N/A                  | N/A                                                                                                     | N/A                                  | carcass_7                      |
| AAEL011763 | PPO3    | prophenoloxidase                              | N/A                  | metal ion binding;oxidoreductase activity                                                               | obsolete oxidation-reduction process | carcass_4, carcass_7           |
| AAEL011764 | PPO10   | prophenoloxidase                              | N/A                  | metal ion binding;oxidoreductase activity                                                               | obsolete oxidation-reduction process | carcass_4, carcass_7           |
| AAEL012086 | LRIM1   | leucine-rich immune protein (Long)            | N/A                  | protein binding                                                                                         | N/A                                  | carcass_4                      |
| AAEL012135 | GALE2   | Galectin [Source:UniProtKB/TrEMBL;Acc:Q16MZ7] | N/A                  | carbohydrate binding                                                                                    | N/A                                  | carcass_4                      |
| AAEL012255 | LRIM13  | leucine-rich immune protein (Short)           | N/A                  | protein binding                                                                                         | N/A                                  | midgut_7, carcass_4, carcass_7 |
| AAEL012410 | AGO1b   | eukaryotic translation initiation factor 2C   | N/A                  | nucleic acid binding;protein binding                                                                    | N/A                                  | midgut_4                       |
| AAEL012538 | LRIM6   | leucine-rich immune protein (Short)           | N/A                  | protein binding                                                                                         | N/A                                  | carcass_4, carcass_7           |
| AAEL012767 | LRIM5   | leucine-rich immune protein (Short)           | N/A                  | protein binding                                                                                         | N/A                                  | carcass_4                      |
| AAEL013245 | CLIPB28 | Clip-Domain Serine Protease family B.         | N/A                  | peptidase activity;serine-type endopeptidase activity                                                   | proteolysis                          | carcass_4, carcass_4           |
| AAEL013417 | N/A     | fibrinogen and fibronectin                    | N/A                  | N/A                                                                                                     | N/A                                  | carcass_7                      |
| AAEL013434 | N/A     | spaetzle-like cytokine                        | N/A                  | N/A                                                                                                     | N/A                                  | carcass_7                      |
| AAEL013496 | PPO8    | prophenoloxidase                              | N/A                  | metal ion binding;oxidoreductase activity                                                               | obsolete oxidation-reduction process | carcass_4, carcass_7           |
| AAEL013501 | PPO4    | prophenoloxidase                              | N/A                  | metal ion binding;oxidoreductase activity                                                               | obsolete oxidation-reduction process | carcass_4                      |
| AAEL014349 | CLIPB15 | Clip-Domain Serine Protease family B.         | extracellular region | hydrolase activity;peptidase activity;serine-type endopeptidase activity;serine-type peptidase activity | proteolysis                          | carcass_4                      |

|            |         |                                                                           |                     |                      |     |                                                       |
|------------|---------|---------------------------------------------------------------------------|---------------------|----------------------|-----|-------------------------------------------------------|
| AAEL014382 | CTLMA14 | C-Type Lectin (CTL) - mannose binding.                                    | N/A                 | carbohydrate binding | N/A | carcass_4                                             |
| AAEL017249 | SRPN24  | Serine Protease Inhibitor (serpin) homologue - unlikely to be inhibitory. | extracellular space | N/A                  | N/A | carcass_4                                             |
| AAEL017536 | GRRP    | holotricin glycine rich repeat protein (GRRP) anti-microbial peptide      | N/A                 | N/A                  | N/A | carcass_4, carcass_4, carcass_4, carcass_7, carcass_7 |

CC, cellular component; MF, molecular function; BP, biological process.
