# Supplementary material for: Wolbachia-mediated resistance to Zika virus infection in Aedes aegypti is dominated by diverse transcriptional regulation and weak evolutionary pressures
Source: PubMed Central journal article supplement (PMC10569609; doi:10.1371/journal.pntd.0011674), 2023-10-02
Supplement: pntd.0011674.s010.pdf [file pntd.0011674.s010.pdf]

**S3 Table. Genes differentially expressed in ZIKV-exposed COL.wMel carcasses 7dpf.**

| Gene ID    | Product Description                                                    | Gene Name or Symbol |
|------------|------------------------------------------------------------------------|---------------------|
| AAEL000102 | unspecified product                                                    | N/A                 |
| AAEL000311 | unspecified product                                                    | N/A                 |
| AAEL000415 | AMP dependent coa ligase                                               | N/A                 |
| AAEL000566 | unspecified product                                                    | N/A                 |
| AAEL000658 | unspecified product                                                    | N/A                 |
| AAEL000859 | unspecified product                                                    | N/A                 |
| AAEL001062 | unspecified product                                                    | N/A                 |
| AAEL001091 | Malic enzyme [Source:UniProtKB/TrEMBL;Acc:A0A1S4EXR8]                  | N/A                 |
| AAEL001209 | sodium-dependent phosphate transporter                                 | N/A                 |
| AAEL001232 | tubulointerstitial nephritis antigen                                   | N/A                 |
| AAEL001293 | unspecified product                                                    | N/A                 |
| AAEL001307 | SEC14, putative                                                        | N/A                 |
| AAEL001818 | unspecified product                                                    | N/A                 |
| AAEL002378 | Carboxylic ester hydrolase<br>[Source:UniProtKB/TrEMBL;Acc:A0A0P6IY17] | N/A                 |
| AAEL002416 | short-chain dehydrogenase                                              | N/A                 |
| AAEL002467 | unspecified product                                                    | N/A                 |
| AAEL002796 | l-asparaginase i                                                       | N/A                 |
| AAEL002978 | leucyl aminopeptidase, putative                                        | N/A                 |
| AAEL003002 | unspecified product                                                    | N/A                 |
| AAEL003803 | unspecified product                                                    | N/A                 |
| AAEL004297 | ATP-citrate synthase                                                   | N/A                 |
| AAEL004941 | cytochrome P450                                                        | CYP6AK1             |
| AAEL004974 | beta-1,3-glucuronyltransferase s, p                                    | N/A                 |
| AAEL005147 | unspecified product                                                    | N/A                 |
| AAEL005199 | Carboxylic ester hydrolase<br>[Source:UniProtKB/TrEMBL;Acc:A0A1S4F9U8] | N/A                 |
| AAEL005256 | unspecified product                                                    | N/A                 |
| AAEL005293 | Galectin [Source:UniProtKB/TrEMBL;Acc:Q16ND5]                          | GALE8A              |
| AAEL005428 | unspecified product                                                    | N/A                 |
| AAEL005515 | heterogeneous nuclear ribonucleoprotein                                | N/A                 |
| AAEL005790 | malic enzyme                                                           | N/A                 |
| AAEL005992 | adam (a disintegrin and metalloprotease)                               | N/A                 |
| AAEL006721 | 2-oxoglutarate dehydrogenase                                           | N/A                 |
| AAEL006883 | unspecified product                                                    | N/A                 |
| AAEL007010 | cytochrome P450                                                        | CYP6AG4             |
| AAEL007029 | tropomodulin                                                           | N/A                 |
| AAEL007271 | basic helix-loop-helix zip transcription factor                        | N/A                 |
| AAEL007381 | unspecified product                                                    | N/A                 |
| AAEL007653 | allantoinase                                                           | N/A                 |
| AAEL007914 | discs large protein                                                    | N/A                 |

|            |                                                                                  |         |
|------------|----------------------------------------------------------------------------------|---------|
| AAEL009129 | cytochrome P450                                                                  | CYP6Z9  |
| AAEL009630 | high-affinity cgmp-specific 3,5-cyclic phosphodiesterase                         | N/A     |
| AAEL009645 | unspecified product                                                              | N/A     |
| AAEL010075 | oxidoreductase                                                                   | N/A     |
| AAEL010128 | leucine-rich immune protein (Long)                                               | LRIM4   |
| AAEL010366 | glucosyl/glucuronosyl transferases                                               | N/A     |
| AAEL010712 | low-density lipoprotein receptor (ldl)                                           | N/A     |
| AAEL011006 | guanylate kinase                                                                 | N/A     |
| AAEL011133 | unspecified product                                                              | N/A     |
| AAEL011161 | unspecified product                                                              | N/A     |
| AAEL012110 | protease m1 zinc metalloprotease                                                 | N/A     |
| AAEL012409 | pantothenate kinase                                                              | N/A     |
| AAEL012446 | Inhibitor of Apoptosis (IAP) containing Baculoviral IAP Repeat(s) (BIR domains). | IAP6    |
| AAEL012740 | ATPase subunit, putative                                                         | N/A     |
| AAEL013262 | unspecified product                                                              | N/A     |
| AAEL013347 | lethal(2)essential for life protein, l2efl                                       | N/A     |
| AAEL013349 | lethal(2)essential for life protein, l2efl                                       | N/A     |
| AAEL013431 | proline oxidase                                                                  | N/A     |
| AAEL013484 | unspecified product                                                              | N/A     |
| AAEL013662 | anterior fat body protein                                                        | N/A     |
| AAEL013812 | unspecified product                                                              | N/A     |
| AAEL013885 | unspecified product                                                              | N/A     |
| AAEL014303 | neuroigin,                                                                       | N/A     |
| AAEL014578 | ssm4 protein                                                                     | N/A     |
| AAEL014619 | cytochrome P450                                                                  | CYP9J22 |
| AAEL014863 | glycogenin                                                                       | N/A     |
| AAEL014999 | unspecified product                                                              | N/A     |
| AAEL017514 | unspecified product                                                              | N/A     |
| AAEL018117 | unspecified product                                                              | N/A     |
| AAEL018219 | unspecified product                                                              | N/A     |
| AAEL018668 | ATP synthase F0 subunit 6                                                        | ATP6    |
| AAEL018685 | cytochrome b                                                                     | CYTB    |
| AAEL019494 | unspecified product                                                              | N/A     |
| AAEL019495 | unspecified product                                                              | N/A     |
| AAEL019504 | unspecified product                                                              | N/A     |
| AAEL019639 | unspecified product                                                              | N/A     |
| AAEL019713 | unspecified product                                                              | N/A     |
| AAEL020524 | unspecified product                                                              | N/A     |
| AAEL020997 | pseudogene                                                                       | N/A     |
| AAEL021035 | unspecified product                                                              | N/A     |
| AAEL021471 | unspecified product                                                              | N/A     |
| AAEL021762 | unspecified product                                                              | N/A     |
| AAEL021861 | unspecified product                                                              | N/A     |
| AAEL022059 | pseudogene                                                                       | N/A     |

|                   |                     |     |
|-------------------|---------------------|-----|
| <b>AAEL023634</b> | unspecified product | N/A |
| <b>AAEL023799</b> | pseudogene          | N/A |
| <b>AAEL024512</b> | pseudogene          | N/A |
| <b>AAEL025488</b> | unspecified product | N/A |
| <b>AAEL027008</b> | unspecified product | N/A |
| <b>AAEL027243</b> | pseudogene          | N/A |
| <b>AAEL027593</b> | unspecified product | N/A |
| <b>AAEL027694</b> | unspecified product | N/A |
| <b>AAEL028635</b> | unspecified product | N/A |
| <b>AAEL029056</b> | unspecified product | N/A |
