# Supplementary material for: Wolbachia-mediated resistance to Zika virus infection in Aedes aegypti is dominated by diverse transcriptional regulation and weak evolutionary pressures
Source: PubMed Central journal article supplement (PMC10569609; doi:10.1371/journal.pntd.0011674), 2023-10-02
Supplement: pntd.0011674.s011.pdf [file pntd.0011674.s011.pdf]

**S4 Table. Genes differentially expressed in ZIKV-exposed COL.wMel midguts 7dpf.**

| Gene ID    | Product Description                                                   | Gene Name or Symbol |
|------------|-----------------------------------------------------------------------|---------------------|
| AAEL000080 | phosphoenolpyruvate carboxykinase                                     | N/A                 |
| AAEL000128 | P130                                                                  | N/A                 |
| AAEL000271 | gamma-glutamyl hydrolase                                              | N/A                 |
| AAEL000294 | unspecified product                                                   | N/A                 |
| AAEL000323 | cysteine-rich venom protein, putative                                 | N/A                 |
| AAEL000416 | FHA domain-containing protein [Source:UniProtKB/TrEMBL;Acc:A0A1S4EV1] | N/A                 |
| AAEL000488 | unspecified product                                                   | N/A                 |
| AAEL000512 | Dynein heavy chain [Source:UniProtKB/TrEMBL;Acc:A0A1S4EW29]           | N/A                 |
| AAEL000566 | unspecified product                                                   | N/A                 |
| AAEL000636 | unspecified product                                                   | N/A                 |
| AAEL000713 | reticulon/nogo                                                        | N/A                 |
| AAEL000757 | anterior fat body protein                                             | N/A                 |
| AAEL000859 | unspecified product                                                   | N/A                 |
| AAEL000898 | unspecified product                                                   | N/A                 |
| AAEL000902 | sugar transporter                                                     | N/A                 |
| AAEL000905 | unspecified product                                                   | N/A                 |
| AAEL000923 | unspecified product                                                   | N/A                 |
| AAEL001062 | unspecified product                                                   | N/A                 |
| AAEL001209 | sodium-dependent phosphate transporter                                | N/A                 |
| AAEL001232 | tubulointerstitial nephritis antigen                                  | N/A                 |
| AAEL001254 | unspecified product                                                   | N/A                 |
| AAEL001421 | high density lipoprotein binding protein / vigilin                    | N/A                 |
| AAEL001434 | coronin                                                               | N/A                 |
| AAEL001511 | unspecified product                                                   | N/A                 |
| AAEL001532 | FAD NAD binding oxidoreductases                                       | N/A                 |
| AAEL001580 | otefin, putative                                                      | N/A                 |
| AAEL001632 | multicopper oxidase                                                   | N/A                 |
| AAEL001650 | ML domain-containing protein [Source:UniProtKB/TrEMBL;Acc:A0A1S4EZ1]  | N/A                 |
| AAEL001667 | multicopper oxidase                                                   | N/A                 |
| AAEL001749 | ventrithoid transmembrane protein, putative                           | N/A                 |
| AAEL001816 | glucosyl/glucuronosyl transferases                                    | N/A                 |
| AAEL001818 | unspecified product                                                   | N/A                 |
| AAEL001837 | Lipase [Source:UniProtKB/TrEMBL;Acc:A0A1S4EZ5]                        | N/A                 |

|            |                                                                                  |      |
|------------|----------------------------------------------------------------------------------|------|
| AAEL001900 | lactosylceramide 4-alpha-galactosyltransferase (alpha-1,4-galactosyltransferase) | N/A  |
| AAEL001905 | unspecified product                                                              | N/A  |
| AAEL001919 | protein tyrosine phosphatase, non-receptor type nt1                              | N/A  |
| AAEL001986 | kinesin-like protein KIF1B                                                       | N/A  |
| AAEL002036 | unspecified product                                                              | N/A  |
| AAEL002080 | septin interacting protein, putative                                             | N/A  |
| AAEL002102 | unspecified product                                                              | N/A  |
| AAEL002109 | unspecified product                                                              | N/A  |
| AAEL002130 | ecdysone inducible protein L2, putative                                          | N/A  |
| AAEL002176 | inosine-uridine preferring nucleoside hydrolase                                  | N/A  |
| AAEL002199 | unspecified product                                                              | N/A  |
| AAEL002235 | unspecified product                                                              | N/A  |
| AAEL002261 | GTP cyclohydrolase i                                                             | N/A  |
| AAEL002309 | Thioredoxin Peroxidase.                                                          | TPX4 |
| AAEL002467 | unspecified product                                                              | N/A  |
| AAEL002557 | cationic amino acid transporter                                                  | N/A  |
| AAEL002623 | unspecified product                                                              | N/A  |
| AAEL002652 | unspecified product                                                              | N/A  |
| AAEL002661 | Matrix metalloproteinase [Source:UniProtKB/TrEMBL;Acc:A0A1S4F2E2]                | N/A  |
| AAEL002671 | unspecified product                                                              | N/A  |
| AAEL002690 | beat protein                                                                     | N/A  |
| AAEL002714 | kinesin-like protein KIF23 (mitotic kinesin-like protein 1)                      | N/A  |
| AAEL002757 | unspecified product                                                              | N/A  |
| AAEL002796 | l-asparaginase i                                                                 | N/A  |
| AAEL002848 | tubulin beta chain                                                               | N/A  |
| AAEL002854 | F-box domain-containing protein [Source:UniProtKB/TrEMBL;Acc:A0A1S4F302]         | N/A  |
| AAEL002886 | thioredoxin reductase                                                            | N/A  |
| AAEL002919 | unspecified product                                                              | N/A  |
| AAEL002921 | unspecified product                                                              | N/A  |
| AAEL002978 | leucyl aminopeptidase, putative                                                  | N/A  |
| AAEL003051 | unspecified product                                                              | N/A  |
| AAEL003063 | Semaphorin [Source:UniProtKB/TrEMBL;Acc:A0A1S4F3R5]                              | N/A  |
| AAEL003294 | fibrinogen and fibronectin                                                       | N/A  |
| AAEL003317 | alkaline phosphatase                                                             | N/A  |
| AAEL003589 | transcription factor, putative                                                   | N/A  |
| AAEL003619 | sodium/chloride dependent amino acid transporter                                 | N/A  |

|            |                                                              |         |
|------------|--------------------------------------------------------------|---------|
| AAEL003681 | unspecified product                                          | N/A     |
| AAEL003712 | C-Type Lysozyme (Lys-E).                                     | LYSC10  |
| AAEL003950 | helicase                                                     | N/A     |
| AAEL003951 | unspecified product                                          | N/A     |
| AAEL004090 | unspecified product                                          | N/A     |
| AAEL004092 | deoxyribonuclease I, putative                                | N/A     |
| AAEL004126 | sterol desaturase                                            | N/A     |
| AAEL004206 | unspecified product                                          | N/A     |
| AAEL004212 | unspecified product                                          | N/A     |
| AAEL004302 | unspecified product                                          | N/A     |
| AAEL004310 | p15-2a protein, putative                                     | N/A     |
| AAEL004319 | epidermal growth factor receptor                             | N/A     |
| AAEL004386 | chorion peroxidase                                           | pxt     |
| AAEL004392 | IAP-antagonist Michelob_x-like Protein                       | IMP     |
| AAEL004520 | cAMP/cgmp cyclic nucleotide phosphodiesterase                | N/A     |
| AAEL004710 | spingomyelin synthetase                                      | N/A     |
| AAEL004729 | unspecified product                                          | N/A     |
| AAEL004868 | hemomucin                                                    | N/A     |
| AAEL004870 | cytochrome P450                                              | CYP18A1 |
| AAEL004964 | unspecified product                                          | N/A     |
| AAEL004981 | cation-transporting ATPase                                   | N/A     |
| AAEL005008 | aquaporin                                                    | N/A     |
| AAEL005071 | GTP binding protein [Source:UniProtKB/TrEMBL;Acc:A0A1S4F9G8] | N/A     |
| AAEL005255 | PAR-domain protein 1                                         | PDP1    |
| AAEL005342 | unspecified product                                          | N/A     |
| AAEL005347 | unspecified product                                          | N/A     |
| AAEL005417 | annexin x                                                    | N/A     |
| AAEL005428 | unspecified product                                          | N/A     |
| AAEL005432 | unspecified product                                          | N/A     |
| AAEL005455 | CTP synthase [Source:UniProtKB/TrEMBL;Acc:Q17A05]            | CTPsyn  |
| AAEL005503 | unspecified product                                          | N/A     |
| AAEL005666 | matrix metalloproteinase                                     | N/A     |
| AAEL005701 | retinaldehyde binding protein                                | N/A     |
| AAEL005704 | unspecified product                                          | N/A     |
| AAEL005791 | unspecified product                                          | N/A     |
| AAEL005839 | uridine phosphorylase                                        | N/A     |
| AAEL005977 | chondroitin 4-sulfotransferase                               | N/A     |

|            |                                                                                      |         |
|------------|--------------------------------------------------------------------------------------|---------|
| AAEL005992 | adam (a disintegrin and metalloprotease)                                             | N/A     |
| AAEL006028 | unspecified product                                                                  | N/A     |
| AAEL006034 | Vanin-like protein 1 precursor, putative                                             | N/A     |
| AAEL006054 | peptidyl-prolyl cis-trans isomerase (cyclophilin)                                    | N/A     |
| AAEL006171 | n-myc downstream regulated                                                           | N/A     |
| AAEL006216 | unspecified product                                                                  | N/A     |
| AAEL006277 | unspecified product                                                                  | N/A     |
| AAEL006321 | 1-acylglycerol-3-phosphate acyltransferase<br>[Source:UniProtKB/TrEMBL;Acc:Q176M5]   | N/A     |
| AAEL006355 | Class C Scavenger Receptor (Sushi/SCR/CCP MAM and Somatomedin B domains).            | SCRC1   |
| AAEL006361 | Class C Scavenger Receptor (Sushi/SCR/CCP MAM and Somatomedin B domains).            | SCRC2   |
| AAEL006449 | ser/thr protein kinase-lyk4                                                          | N/A     |
| AAEL006480 | unspecified product                                                                  | N/A     |
| AAEL006518 | cytidine deaminase, putative                                                         | N/A     |
| AAEL006663 | ANK_REP_REGION domain-containing protein<br>[Source:UniProtKB/TrEMBL;Acc:A0A1S4FEA3] | N/A     |
| AAEL006686 | unspecified product                                                                  | N/A     |
| AAEL006708 | hedgehog                                                                             | N/A     |
| AAEL006723 | unspecified product                                                                  | N/A     |
| AAEL006809 | voltage-gated ion channel                                                            | N/A     |
| AAEL006902 | serine-type enodpeptidase,                                                           | N/A     |
| AAEL006921 | calmodulin                                                                           | N/A     |
| AAEL006978 | protein-glutamine gamma-glutamyltransferase                                          | N/A     |
| AAEL007004 | GPCR Bride of Sevenless Family                                                       | GPRBOS1 |
| AAEL007018 | udp-glucose 4-epimerase                                                              | N/A     |
| AAEL007030 | ceramidase                                                                           | N/A     |
| AAEL007097 | 4-nitrophenylphosphatase [Source:UniProtKB/TrEMBL;Acc:Q0IF18]                        | N/A     |
| AAEL007120 | lim homeobox protein                                                                 | N/A     |
| AAEL007191 | amino acid transporter                                                               | N/A     |
| AAEL007208 | unspecified product                                                                  | N/A     |
| AAEL007238 | DUF3421 domain-containing protein<br>[Source:UniProtKB/TrEMBL;Acc:A0A1S4FG14]        | N/A     |
| AAEL007258 | unspecified product                                                                  | N/A     |
| AAEL007271 | basic helix-loop-helix zip transcription factor                                      | N/A     |
| AAEL007299 | Cadherin, putative [Source:UniProtKB/TrEMBL;Acc:A0A1S4FG21]                          | N/A     |
| AAEL007344 | LITAF domain-containing protein [Source:UniProtKB/TrEMBL;Acc:A0A1S4FG64]             | N/A     |
| AAEL007547 | chloride channel protein                                                             | N/A     |

|            |                                                                                   |         |
|------------|-----------------------------------------------------------------------------------|---------|
| AAEL007560 | core 1 udp-galactose:n-acetylgalactosamine-alpha-r beta 1,3-galactosyltransferase | N/A     |
| AAEL007657 | low-density lipoprotein receptor (ldl)                                            | N/A     |
| AAEL007765 | Serine Protease Inhibitor (serpin) likely cleavage at K/R. Transcript A.          | SRPN10  |
| AAEL007778 | leucine-rich transmembrane protein                                                | N/A     |
| AAEL007872 | unspecified product                                                               | N/A     |
| AAEL007880 | ornithine decarboxylase                                                           | N/A     |
| AAEL007942 | fibrinogen and fibronectin                                                        | N/A     |
| AAEL007993 | Clip-Domain Serine Protease family B.                                             | CLIPB27 |
| AAEL008024 | unspecified product                                                               | N/A     |
| AAEL008027 | unspecified product                                                               | N/A     |
| AAEL008028 | monocarboxylate transporter                                                       | N/A     |
| AAEL008097 | trypsin-eta, putative                                                             | N/A     |
| AAEL008141 | period circadian protein                                                          | PER     |
| AAEL008267 | GPCR Neurokinin/Tachykinin Family                                                 | GPRNPR5 |
| AAEL008306 | mitogen activated protein kinase kinase kinase 5, mapkkk5, mekk5                  | N/A     |
| AAEL008346 | achaete-scute complex protein T3, putative                                        | N/A     |
| AAEL008467 | cysteine synthase                                                                 | N/A     |
| AAEL008468 | cysteine synthase                                                                 | N/A     |
| AAEL008473 | cysteine-rich venom protein, putative                                             | N/A     |
| AAEL008511 | unspecified product                                                               | N/A     |
| AAEL008547 | unspecified product                                                               | N/A     |
| AAEL008622 | jnk                                                                               | N/A     |
| AAEL008655 | GPCR Vasopressin Family                                                           | GPRVPR2 |
| AAEL008658 | leucine-rich immune protein (TM)                                                  | LRIM16  |
| AAEL008760 | unspecified product                                                               | N/A     |
| AAEL008767 | serine protease                                                                   | N/A     |
| AAEL008782 | serine-type endopeptidase,                                                        | N/A     |
| AAEL008829 | unspecified product                                                               | N/A     |
| AAEL008832 | forkhead box protein (AegFOXN1)                                                   | N/A     |
| AAEL008843 | unspecified product                                                               | N/A     |
| AAEL008910 | unspecified product                                                               | N/A     |
| AAEL008916 | unspecified product                                                               | N/A     |
| AAEL008921 | myosin regulatory light chain 2 smooth muscle                                     | N/A     |
| AAEL008953 | unspecified product                                                               | N/A     |
| AAEL009070 | unspecified product                                                               | N/A     |
| AAEL009114 | unspecified product                                                               | N/A     |
| AAEL009185 | arginine or creatine kinase                                                       | N/A     |

|            |                                                                   |          |
|------------|-------------------------------------------------------------------|----------|
| AAEL009249 | Coronin [Source:UniProtKB/TrEMBL;Acc:A0A1S4FM51]                  | N/A      |
| AAEL009317 | rab11                                                             | N/A      |
| AAEL009333 | unspecified product                                               | N/A      |
| AAEL009371 | unspecified product                                               | N/A      |
| AAEL009556 | Niemann-Pick Type C-2, putative                                   | N/A      |
| AAEL009645 | unspecified product                                               | N/A      |
| AAEL009681 | Putative rhomboid family [Source:UniProtKB/TrEMBL;Acc:A0A0P6IZ43] | N/A      |
| AAEL009762 | cytochrome P450                                                   | CYP307A1 |
| AAEL009813 | glutamate receptor 7 (ampa)                                       | N/A      |
| AAEL009842 | Galectin [Source:UniProtKB/TrEMBL;Acc:Q16UP1]                     | GALE12   |
| AAEL009850 | Galectin [Source:UniProtKB/TrEMBL;Acc:Q16UP0]                     | GALE14   |
| AAEL009987 | unspecified product                                               | N/A      |
| AAEL010050 | unspecified product                                               | N/A      |
| AAEL010075 | oxidoreductase                                                    | N/A      |
| AAEL010084 | unspecified product                                               | N/A      |
| AAEL010094 | cyclin b                                                          | N/A      |
| AAEL010145 | sodium/potassium-dependent ATPase beta-2 subunit                  | N/A      |
| AAEL010264 | unspecified product                                               | N/A      |
| AAEL010270 | unspecified product                                               | N/A      |
| AAEL010375 | unspecified product                                               | N/A      |
| AAEL010477 | unspecified product                                               | N/A      |
| AAEL010483 | oxysterol-binding protein related protein (ORP8)                  | ORP8     |
| AAEL010650 | sodium/solute symporter                                           | N/A      |
| AAEL010661 | phospholipid scramblase 1,                                        | N/A      |
| AAEL010678 | unspecified product                                               | N/A      |
| AAEL010738 | sodium bicarbonate cotransporter                                  | N/A      |
| AAEL010776 | carboxypeptidase                                                  | N/A      |
| AAEL010782 | carboxypeptidase                                                  | N/A      |
| AAEL010840 | unspecified product                                               | N/A      |
| AAEL010932 | RNAse h                                                           | N/A      |
| AAEL010956 | unspecified product                                               | N/A      |
| AAEL011009 | fibrinogen and fibronectin                                        | N/A      |
| AAEL011203 | unspecified product                                               | N/A      |
| AAEL011264 | phosphatidylethanolamine-binding protein                          | N/A      |
| AAEL011424 | Histone H3 [Source:UniProtKB/TrEMBL;Acc:A0A1S4FTJ0]               | N/A      |
| AAEL011510 | multiple inositol polyphosphate phosphatase                       | N/A      |
| AAEL011598 | Gustatory receptor [Source:UniProtKB/TrEMBL;Acc:A0A1S4FU22]       | N/A      |

|            |                                                                                    |         |
|------------|------------------------------------------------------------------------------------|---------|
| AAEL011648 | cyclin d                                                                           | N/A     |
| AAEL011650 | coatomer, gamma-subunit, putative                                                  | N/A     |
| AAEL011653 | thyroid hormone receptor interactor                                                | N/A     |
| AAEL011901 | 1-acyl-sn-glycerol-3-phosphate acyltransferase                                     | N/A     |
| AAEL011937 | glucosyl/glucuronosyl transferases                                                 | N/A     |
| AAEL012003 | Galectin [Source:UniProtKB/TrEMBL;Acc:Q17AG2]                                      | GALE6B  |
| AAEL012014 | L-lactate dehydrogenase [Source:UniProtKB/TrEMBL;Acc:Q16ND1]                       | N/A     |
| AAEL012052 | unspecified product                                                                | N/A     |
| AAEL012062 | Na <sup>+</sup> /K <sup>+</sup> ATPase alpha subunit                               | N/A     |
| AAEL012349 | lipase 1 precursor                                                                 | N/A     |
| AAEL012390 | unspecified product                                                                | N/A     |
| AAEL012410 | eukaryotic translation initiation factor 2C                                        | AGO1b   |
| AAEL012499 | Histone H2A [Source:UniProtKB/TrEMBL;Acc:Q16LW9]                                   | N/A     |
| AAEL012514 | translation initiation factor 2b, delta subunit                                    | N/A     |
| AAEL012522 | Sodium-dependent phosphate transporter<br>[Source:UniProtKB/TrEMBL;Acc:A0A1S4FWV3] | N/A     |
| AAEL012545 | Proliferating cell nuclear antigen [Source:UniProtKB/TrEMBL;Acc:Q4PKD7]            | N/A     |
| AAEL012629 | deoxyuridine 5'-triphosphate nucleotidohydrolase                                   | N/A     |
| AAEL012859 | unspecified product                                                                | N/A     |
| AAEL012960 | importin alpha                                                                     | N/A     |
| AAEL013111 | glutamate transporter                                                              | N/A     |
| AAEL013262 | unspecified product                                                                | N/A     |
| AAEL013276 | acid phosphatase                                                                   | N/A     |
| AAEL013304 | unspecified product                                                                | N/A     |
| AAEL013309 | high-affinity copper uptake protein                                                | N/A     |
| AAEL013345 | alphaA-crystallin, putative                                                        | N/A     |
| AAEL013346 | lethal(2)essential for life protein, l2efl                                         | N/A     |
| AAEL013348 | lethal(2)essential for life protein, l2efl                                         | N/A     |
| AAEL013349 | lethal(2)essential for life protein, l2efl                                         | N/A     |
| AAEL013350 | heat shock protein 26kD, putative                                                  | N/A     |
| AAEL013351 | lethal(2)essential for life protein, l2efl                                         | N/A     |
| AAEL013352 | lethal(2)essential for life protein, l2efl                                         | N/A     |
| AAEL013692 | PIWI                                                                               | PIWI3   |
| AAEL013713 | trypsin                                                                            | N/A     |
| AAEL013780 | unspecified product                                                                | N/A     |
| AAEL013808 | fascin                                                                             | N/A     |
| AAEL013875 | tetraspanin, putative                                                              | N/A     |
| AAEL014019 | cytochrome P450                                                                    | CYP4J16 |

|                   |                                                                                  |         |
|-------------------|----------------------------------------------------------------------------------|---------|
| <b>AAEL014226</b> | unspecified product                                                              | N/A     |
| <b>AAEL014251</b> | Inhibitor of Apoptosis (IAP) containing Baculoviral IAP Repeat(s) (BIR domains). | IAP5    |
| <b>AAEL014348</b> | caspase (short)                                                                  | CASPS8  |
| <b>AAEL014363</b> | unspecified product                                                              | N/A     |
| <b>AAEL014408</b> | m-phase inducer phosphatase(cdc25)                                               | N/A     |
| <b>AAEL014439</b> | juvenile hormone-inducible protein, putative                                     | N/A     |
| <b>AAEL014454</b> | unspecified product                                                              | N/A     |
| <b>AAEL014541</b> | maltose phosphorylase                                                            | N/A     |
| <b>AAEL014567</b> | oviductin                                                                        | N/A     |
| <b>AAEL014945</b> | unspecified product                                                              | N/A     |
| <b>AAEL014981</b> | unspecified product                                                              | N/A     |
| <b>AAEL016975</b> | unspecified product                                                              | N/A     |
| <b>AAEL017331</b> | unspecified product                                                              | N/A     |
| <b>AAEL017553</b> | Carboxy/choline esterase Alpha Esterase                                          | CCEAE2B |
| <b>AAEL018039</b> | unspecified product                                                              | N/A     |
| <b>AAEL018118</b> | unspecified product                                                              | N/A     |
| <b>AAEL018120</b> | Ribosomal protein S6 kinase [Source:UniProtKB/TrEMBL;Acc:Q535V4]                 | N/A     |
| <b>AAEL019504</b> | unspecified product                                                              | N/A     |
| <b>AAEL019536</b> | unspecified product                                                              | N/A     |
| <b>AAEL019604</b> | unspecified product                                                              | N/A     |
| <b>AAEL019610</b> | unspecified product                                                              | N/A     |
| <b>AAEL019623</b> | unspecified product                                                              | N/A     |
| <b>AAEL019677</b> | unspecified product                                                              | N/A     |
| <b>AAEL019681</b> | unspecified product                                                              | N/A     |
| <b>AAEL019700</b> | unspecified product                                                              | N/A     |
| <b>AAEL019712</b> | unspecified product                                                              | N/A     |
| <b>AAEL019722</b> | unspecified product                                                              | N/A     |
| <b>AAEL019728</b> | suppressor of cytokine signaling                                                 | SOCS    |
| <b>AAEL019785</b> | unspecified product                                                              | N/A     |
| <b>AAEL019793</b> | unspecified product                                                              | N/A     |
| <b>AAEL019902</b> | unspecified product                                                              | N/A     |
| <b>AAEL019903</b> | unspecified product                                                              | N/A     |
| <b>AAEL019940</b> | unspecified product                                                              | N/A     |
| <b>AAEL019941</b> | unspecified product                                                              | N/A     |
| <b>AAEL020654</b> | unspecified product                                                              | N/A     |
| <b>AAEL020729</b> | unspecified product                                                              | N/A     |
| <b>AAEL020800</b> | unspecified product                                                              | N/A     |

|                   |                                                         |     |
|-------------------|---------------------------------------------------------|-----|
| <b>AAEL021278</b> | unspecified product                                     | N/A |
| <b>AAEL021318</b> | unspecified product                                     | N/A |
| <b>AAEL021321</b> | unspecified product                                     | N/A |
| <b>AAEL021899</b> | unspecified product                                     | N/A |
| <b>AAEL021925</b> | unspecified product                                     | N/A |
| <b>AAEL021931</b> | unspecified product                                     | N/A |
| <b>AAEL022048</b> | unspecified product                                     | N/A |
| <b>AAEL022059</b> | pseudogene                                              | N/A |
| <b>AAEL022167</b> | unspecified product                                     | N/A |
| <b>AAEL022628</b> | unspecified product                                     | N/A |
| <b>AAEL022659</b> | unspecified product                                     | N/A |
| <b>AAEL023231</b> | unspecified product                                     | N/A |
| <b>AAEL023478</b> | unspecified product                                     | N/A |
| <b>AAEL023490</b> | unspecified product                                     | N/A |
| <b>AAEL023644</b> | unspecified product                                     | N/A |
| <b>AAEL023746</b> | unspecified product                                     | N/A |
| <b>AAEL024003</b> | unspecified product                                     | N/A |
| <b>AAEL024222</b> | unspecified product                                     | N/A |
| <b>AAEL024370</b> | unspecified product                                     | N/A |
| <b>AAEL024512</b> | pseudogene                                              | N/A |
| <b>AAEL024520</b> | unspecified product                                     | N/A |
| <b>AAEL024558</b> | unspecified product                                     | N/A |
| <b>AAEL024675</b> | unspecified product                                     | N/A |
| <b>AAEL024880</b> | unspecified product                                     | N/A |
| <b>AAEL024913</b> | unspecified product                                     | N/A |
| <b>AAEL024940</b> | unspecified product                                     | N/A |
| <b>AAEL025091</b> | unspecified product                                     | N/A |
| <b>AAEL025226</b> | unspecified product                                     | N/A |
| <b>AAEL025432</b> | Cytidine deaminase [Source:UniProtKB/TrEMBL;Acc:Q0IF52] | N/A |
| <b>AAEL025530</b> | unspecified product                                     | N/A |
| <b>AAEL025658</b> | unspecified product                                     | N/A |
| <b>AAEL025718</b> | unspecified product                                     | N/A |
| <b>AAEL025818</b> | unspecified product                                     | N/A |
| <b>AAEL025839</b> | unspecified product                                     | N/A |
| <b>AAEL026025</b> | unspecified product                                     | N/A |
| <b>AAEL026215</b> | unspecified product                                     | N/A |
| <b>AAEL026343</b> | unspecified product                                     | N/A |

|                   |                     |      |
|-------------------|---------------------|------|
| <b>AAEL026466</b> | unspecified product | N/A  |
| <b>AAEL026744</b> | unspecified product | N/A  |
| <b>AAEL026751</b> | unspecified product | N/A  |
| <b>AAEL026981</b> | unspecified product | N/A  |
| <b>AAEL027019</b> | unspecified product | N/A  |
| <b>AAEL027398</b> | unspecified product | N/A  |
| <b>AAEL027593</b> | unspecified product | N/A  |
| <b>AAEL027610</b> | unspecified product | N/A  |
| <b>AAEL027937</b> | unspecified product | N/A  |
| <b>AAEL028005</b> | unspecified product | N/A  |
| <b>AAEL028021</b> | unspecified product | N/A  |
| <b>AAEL028048</b> | unspecified product | N/A  |
| <b>AAEL028088</b> | unspecified product | N/A  |
| <b>AAEL028635</b> | unspecified product | N/A  |
| <b>AAEL029041</b> | unspecified product | N/A  |
| <b>AAEL029044</b> | cecropin            | CECE |
| <b>AAEL029046</b> | cecropin            | CECD |
| <b>AAEL029082</b> | unspecified product | N/A  |
| <b>AAEL029104</b> | unspecified product | N/A  |
| <b>AAEL029107</b> | unspecified product | N/A  |
